# Supplementary figures and images for: Novel mixed self-assembled monolayers of l-cysteine and methanol on gold surfaces under ambient conditions
Source: Royal Society of Chemistry journal article supplement (doi:10.1039/d4nr01848f), 2024-01-01

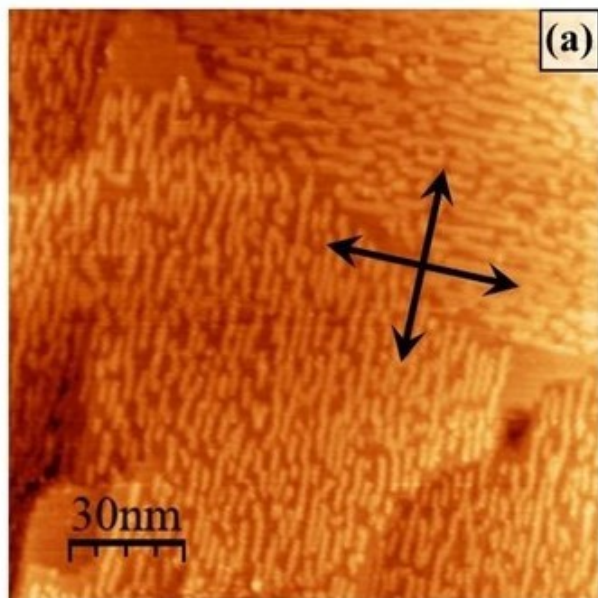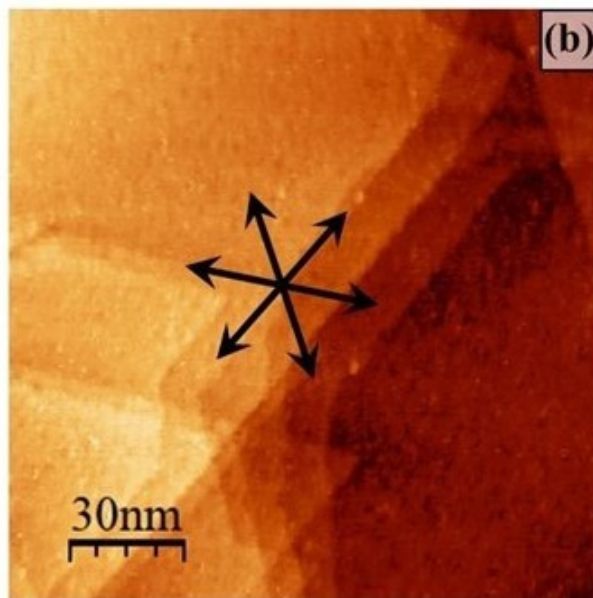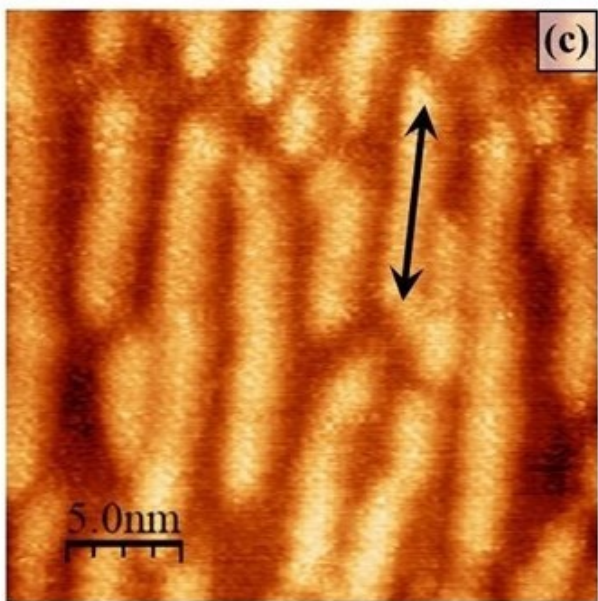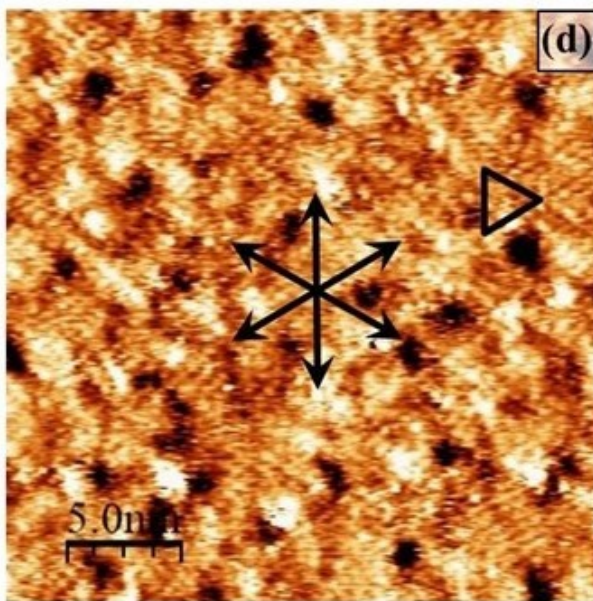

Supplement: d4nr01848f2.pdf [file d4nr01848f2.pdf]

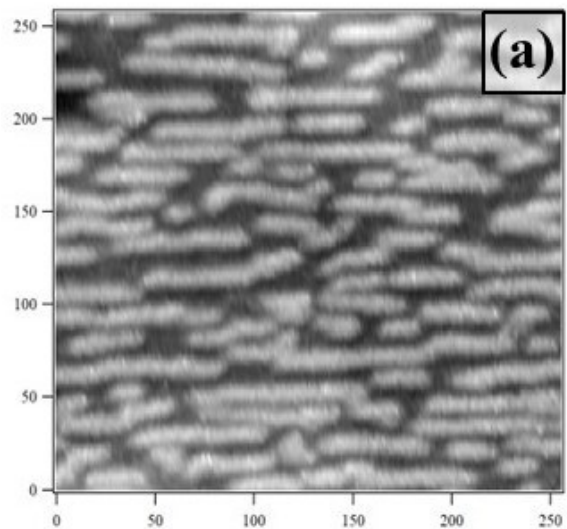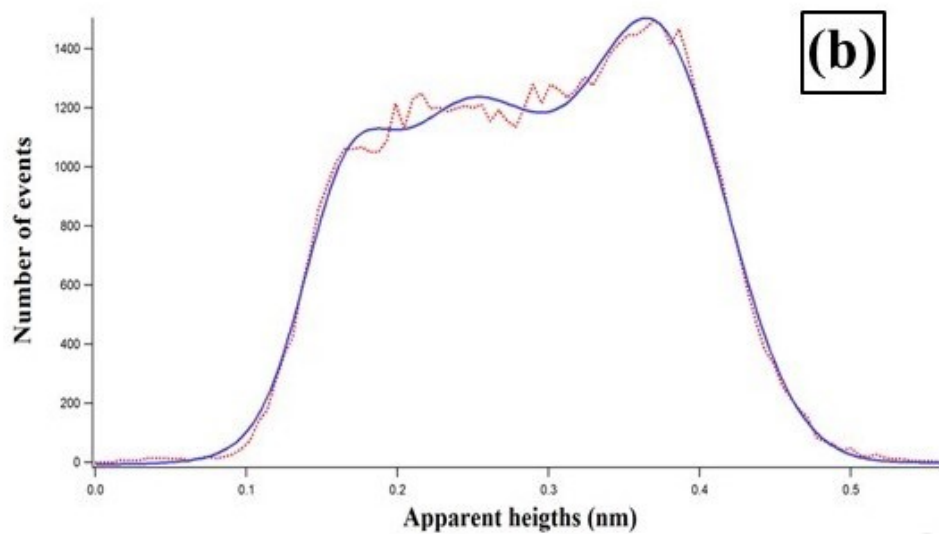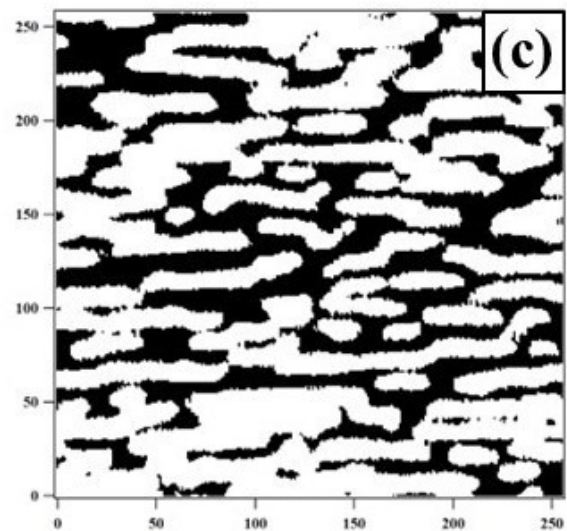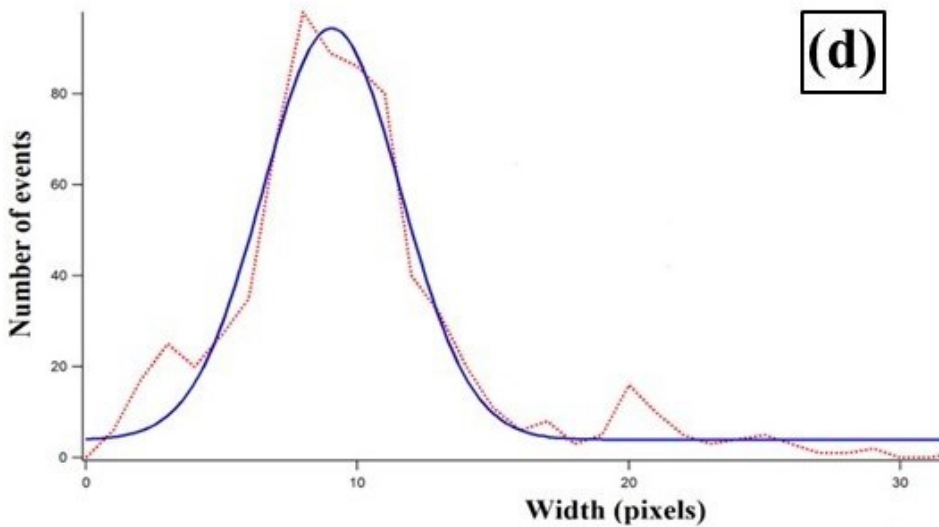

Supplement: d4nr01848f3.pdf [file d4nr01848f3.pdf]

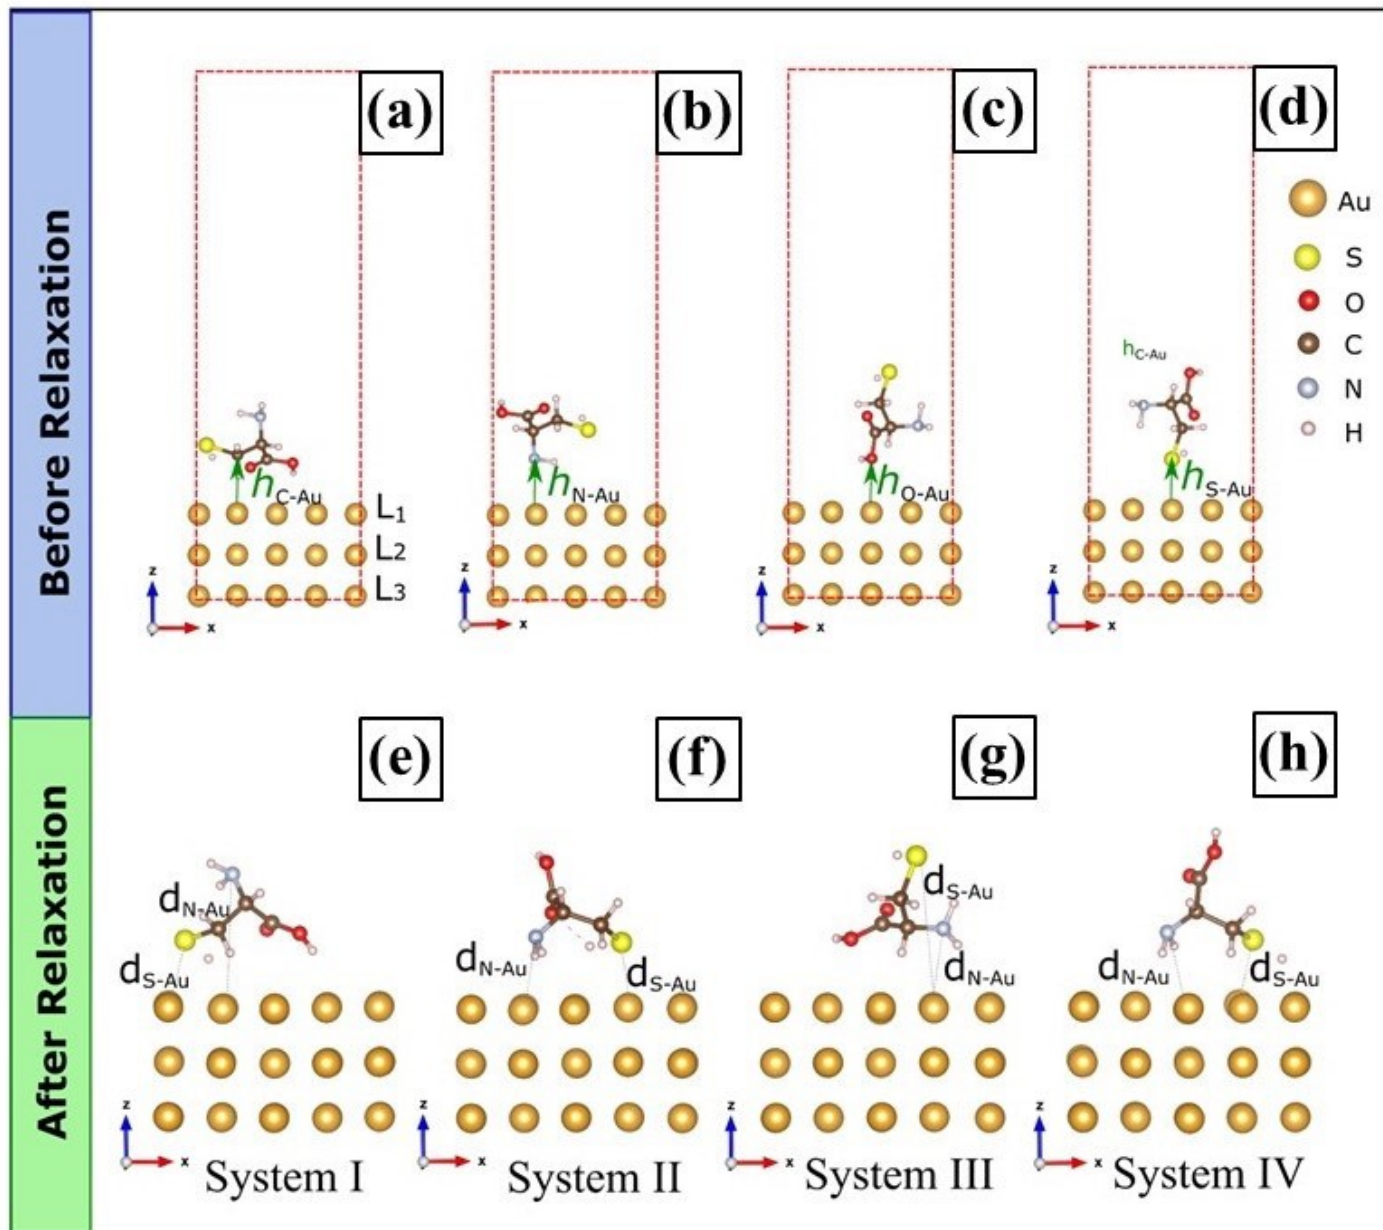

Supplement: d4nr01848f4.pdf [file d4nr01848f4.pdf]

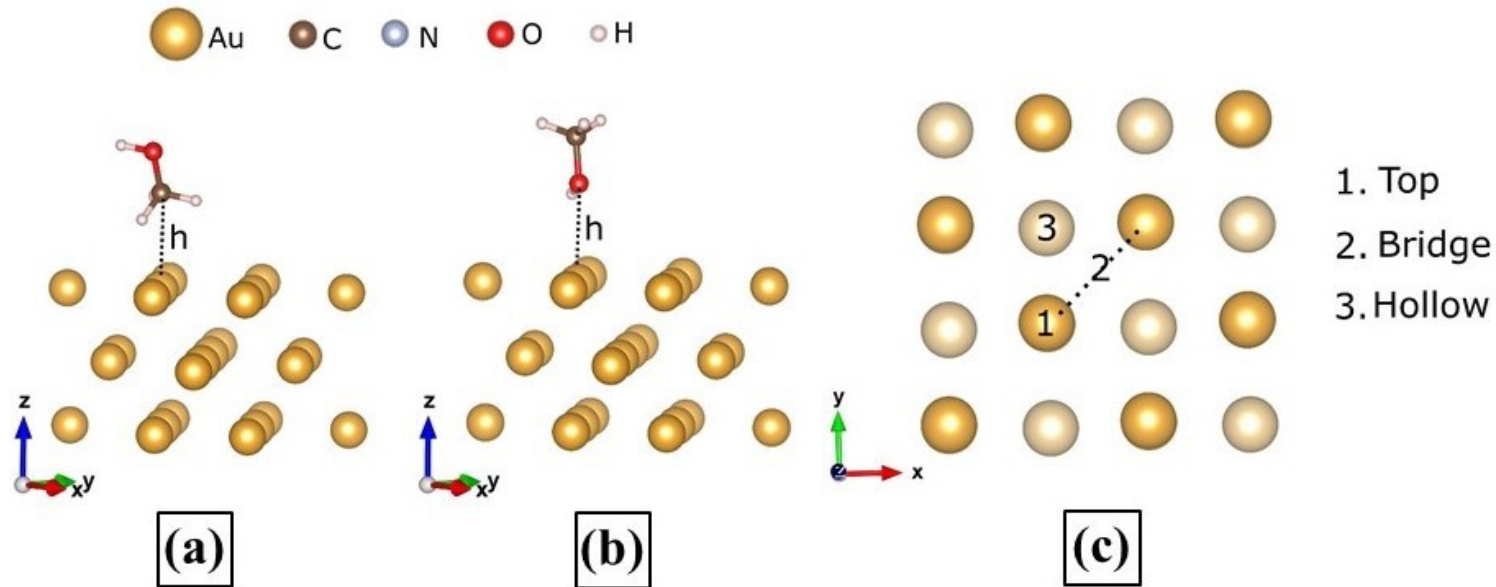

Supplement: d4nr01848f5.pdf [file d4nr01848f5.pdf]

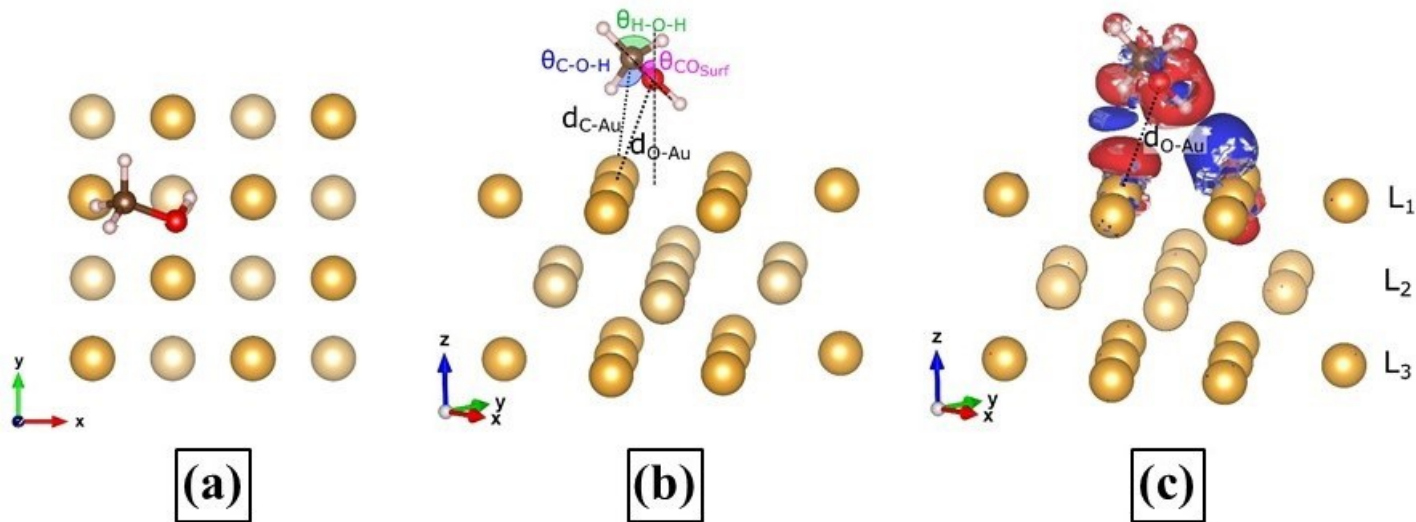

Supplement: d4nr01848f6.pdf [file d4nr01848f6.pdf]

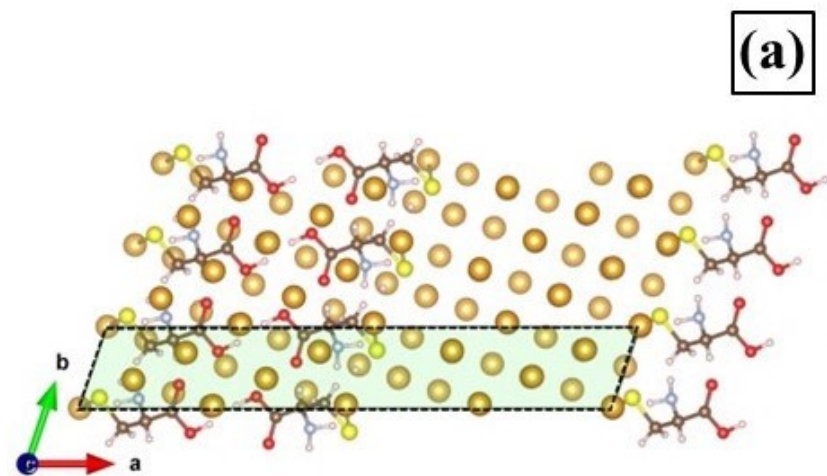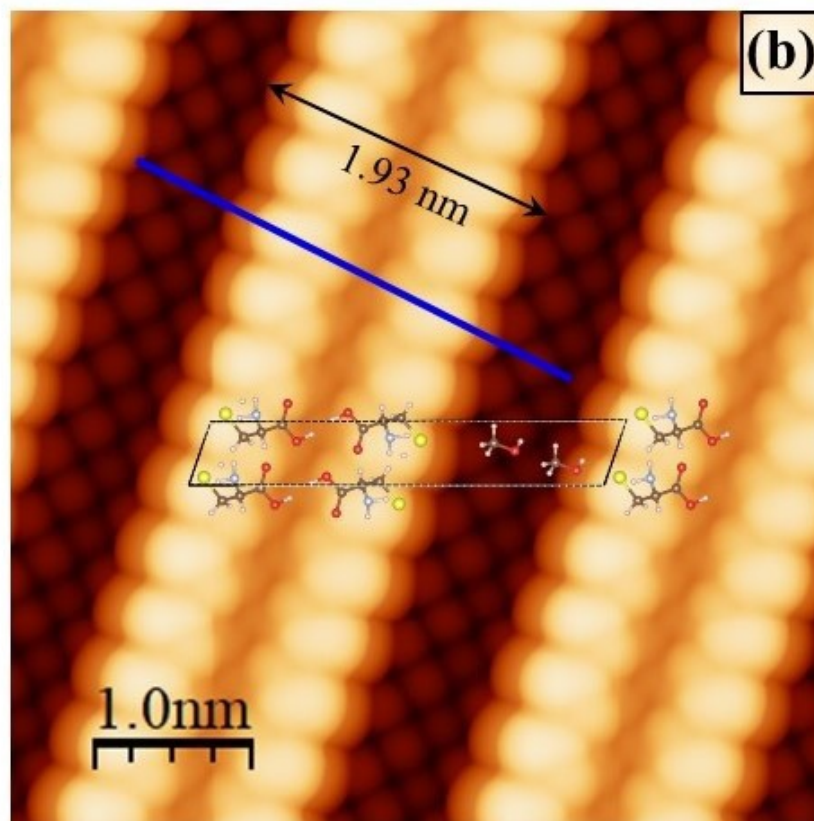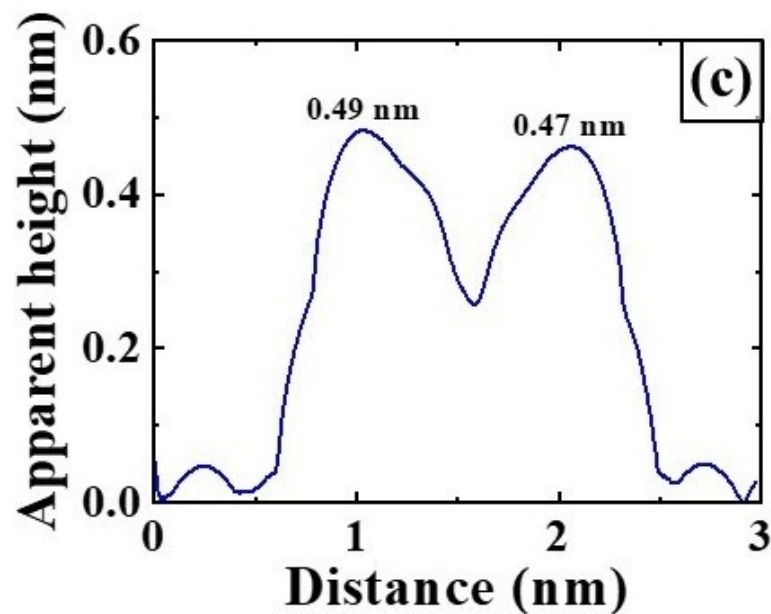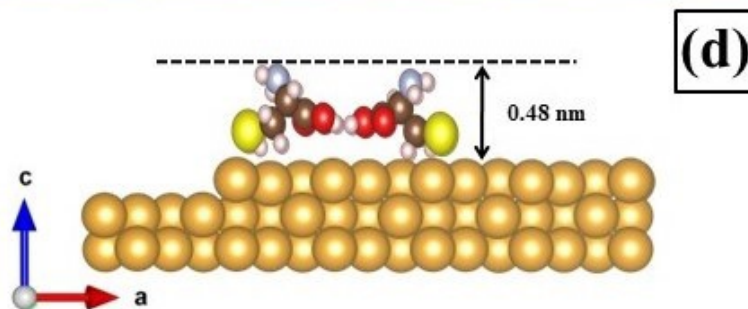

Supplement: d4nr01848f7.pdf [file d4nr01848f7.pdf]
